# Supplementary material for: The impact of financial burden on quality of life among German head and neck cancer survivors
Source: Springer Nature journal article supplement (doi:10.1186/s12885-025-13927-1), 2025-03-20

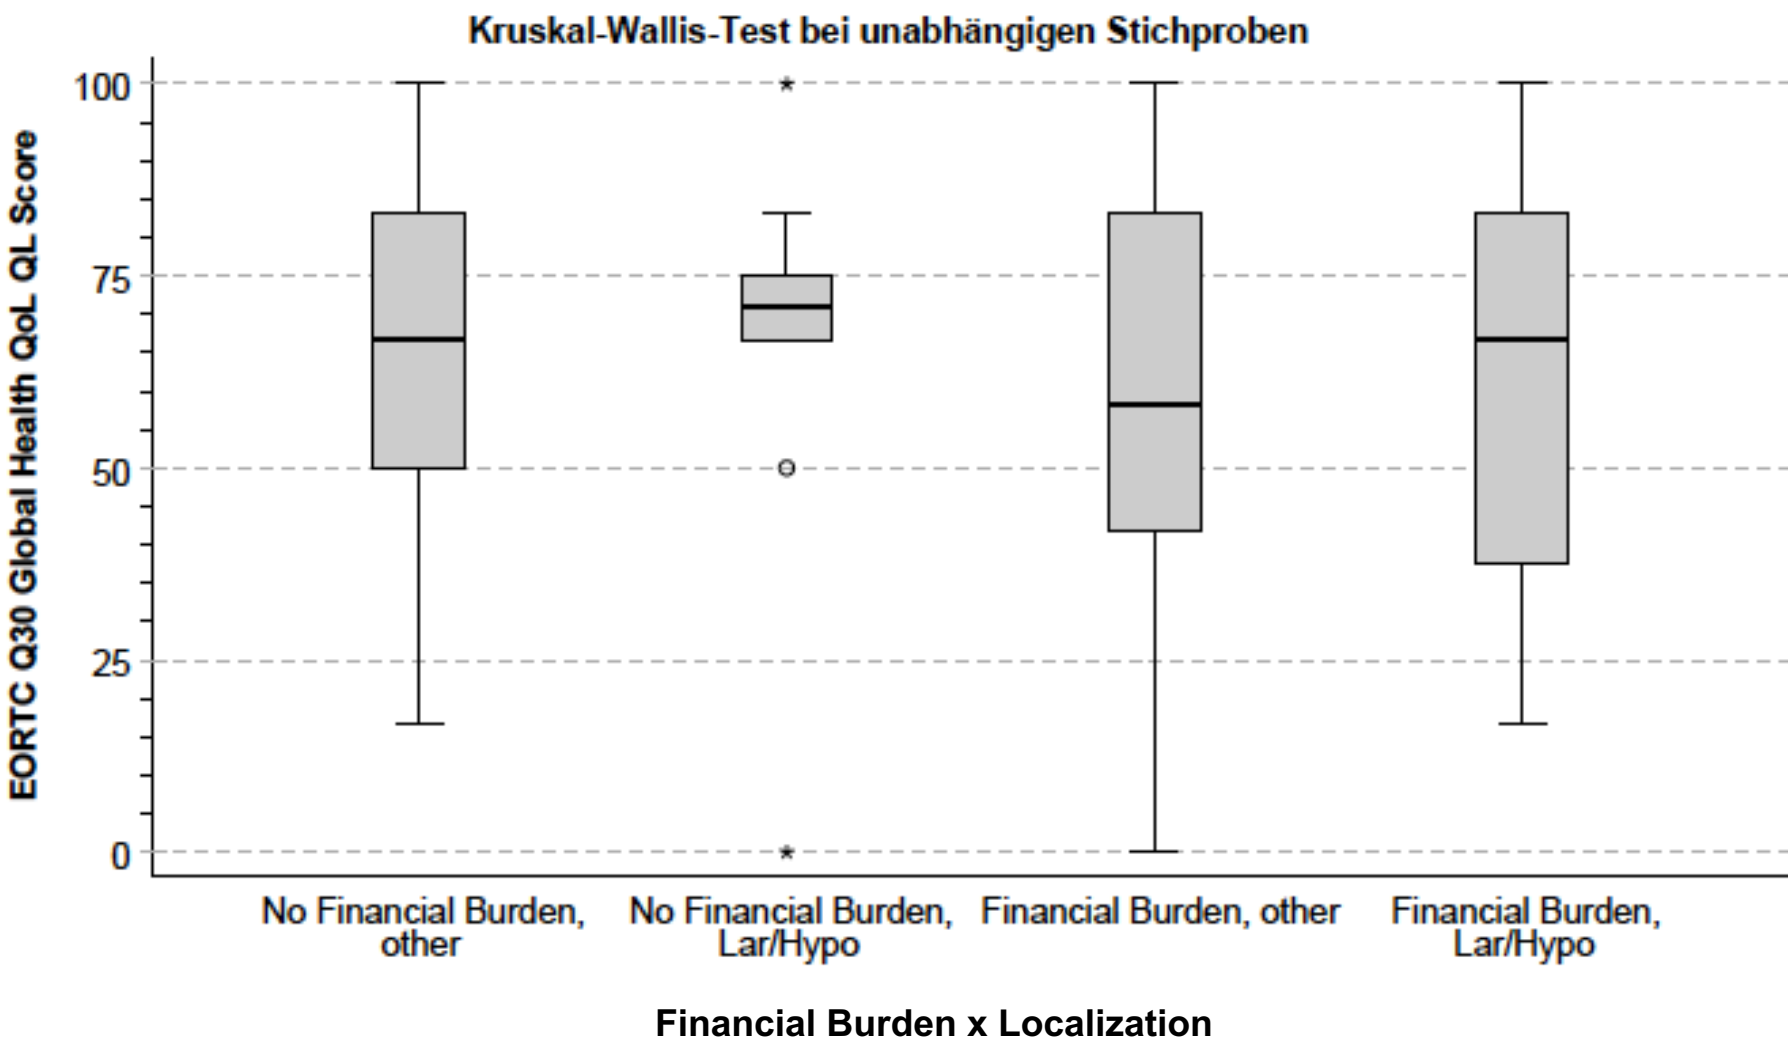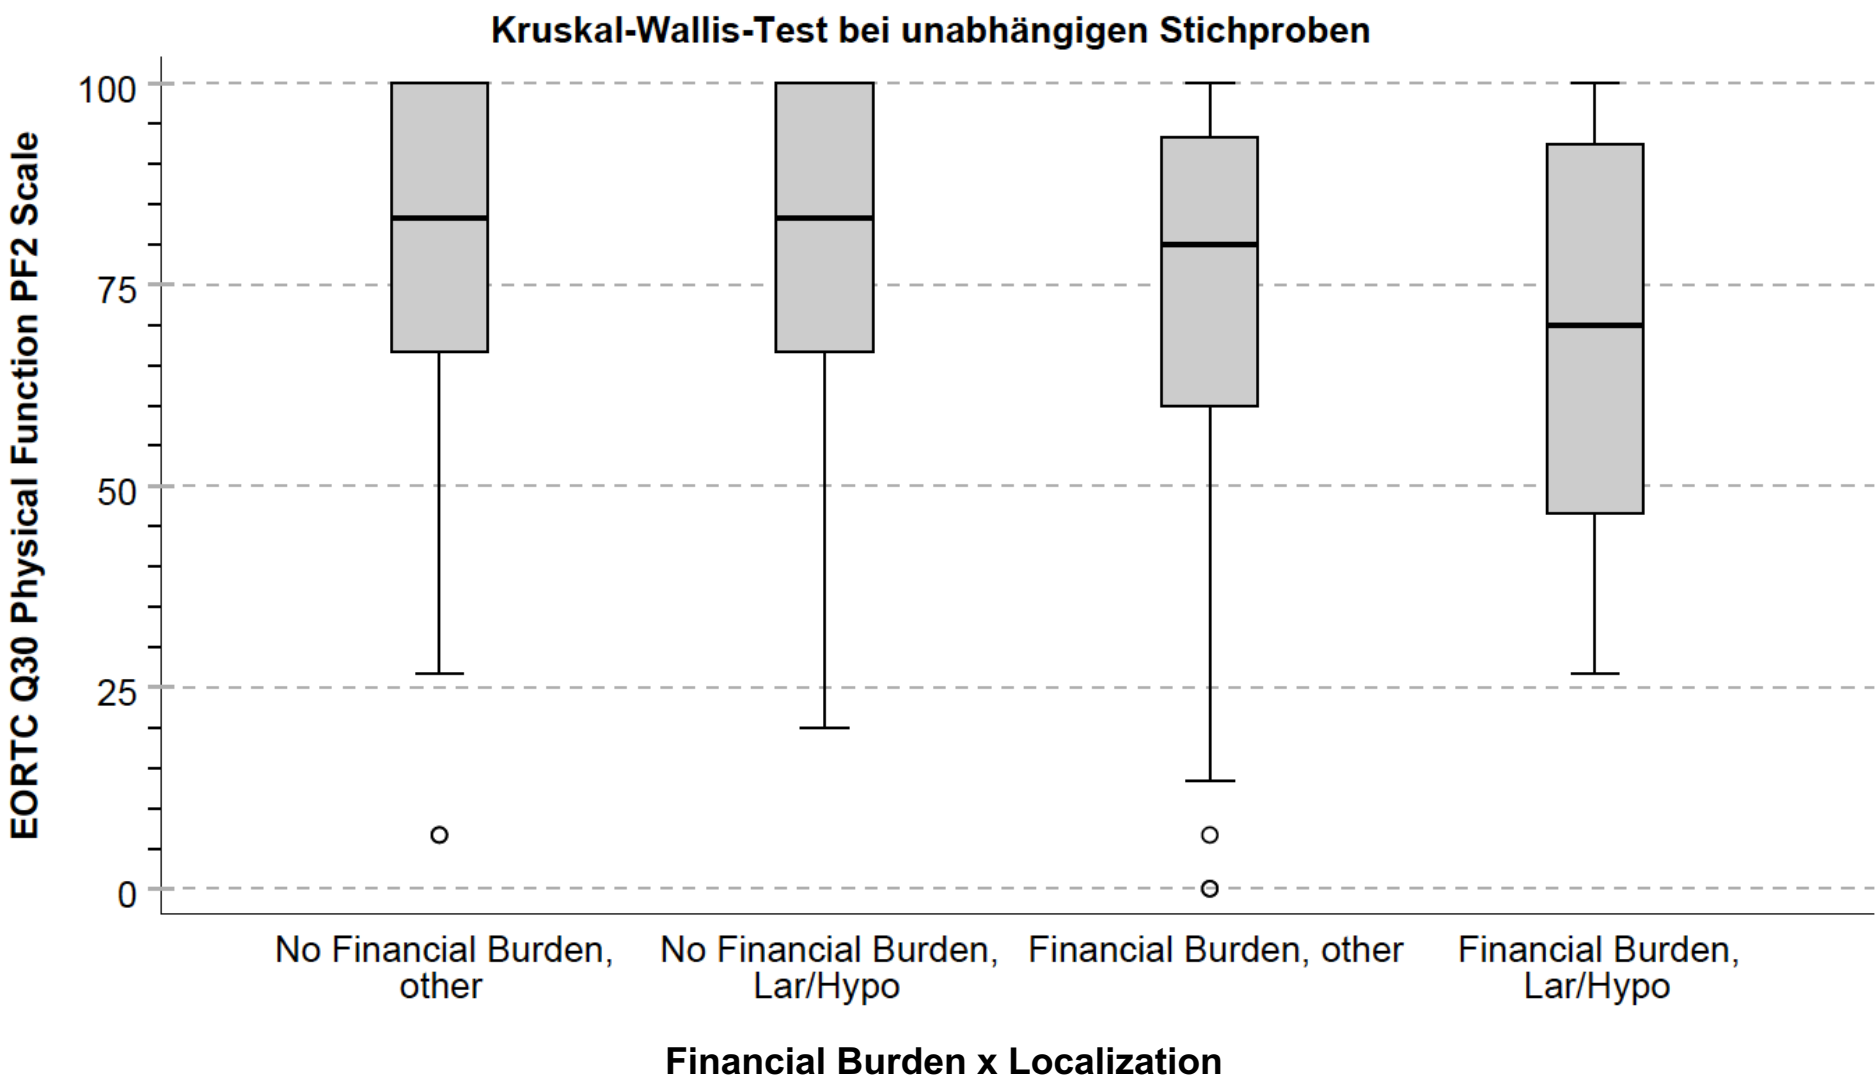

Kruskal-Wallis-Test bei unabhängigen Stichproben

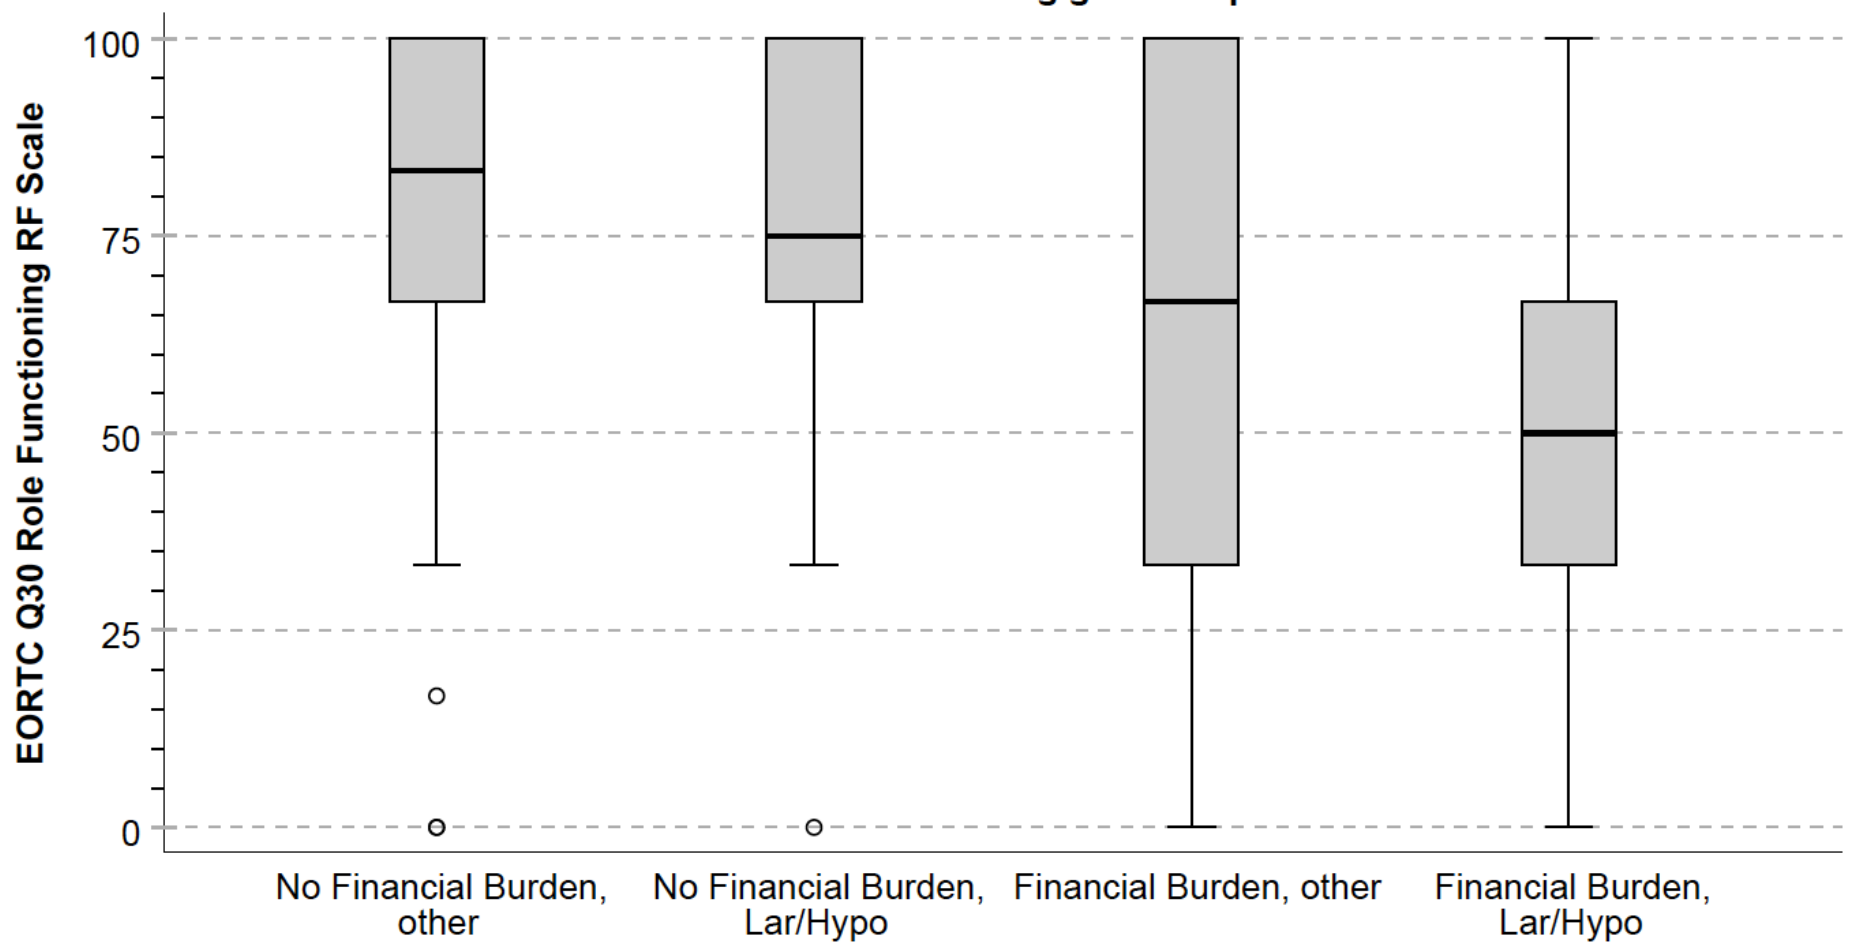

Financial Burden x Localization

Kruskal-Wallis-Test bei unabhängigen Stichproben

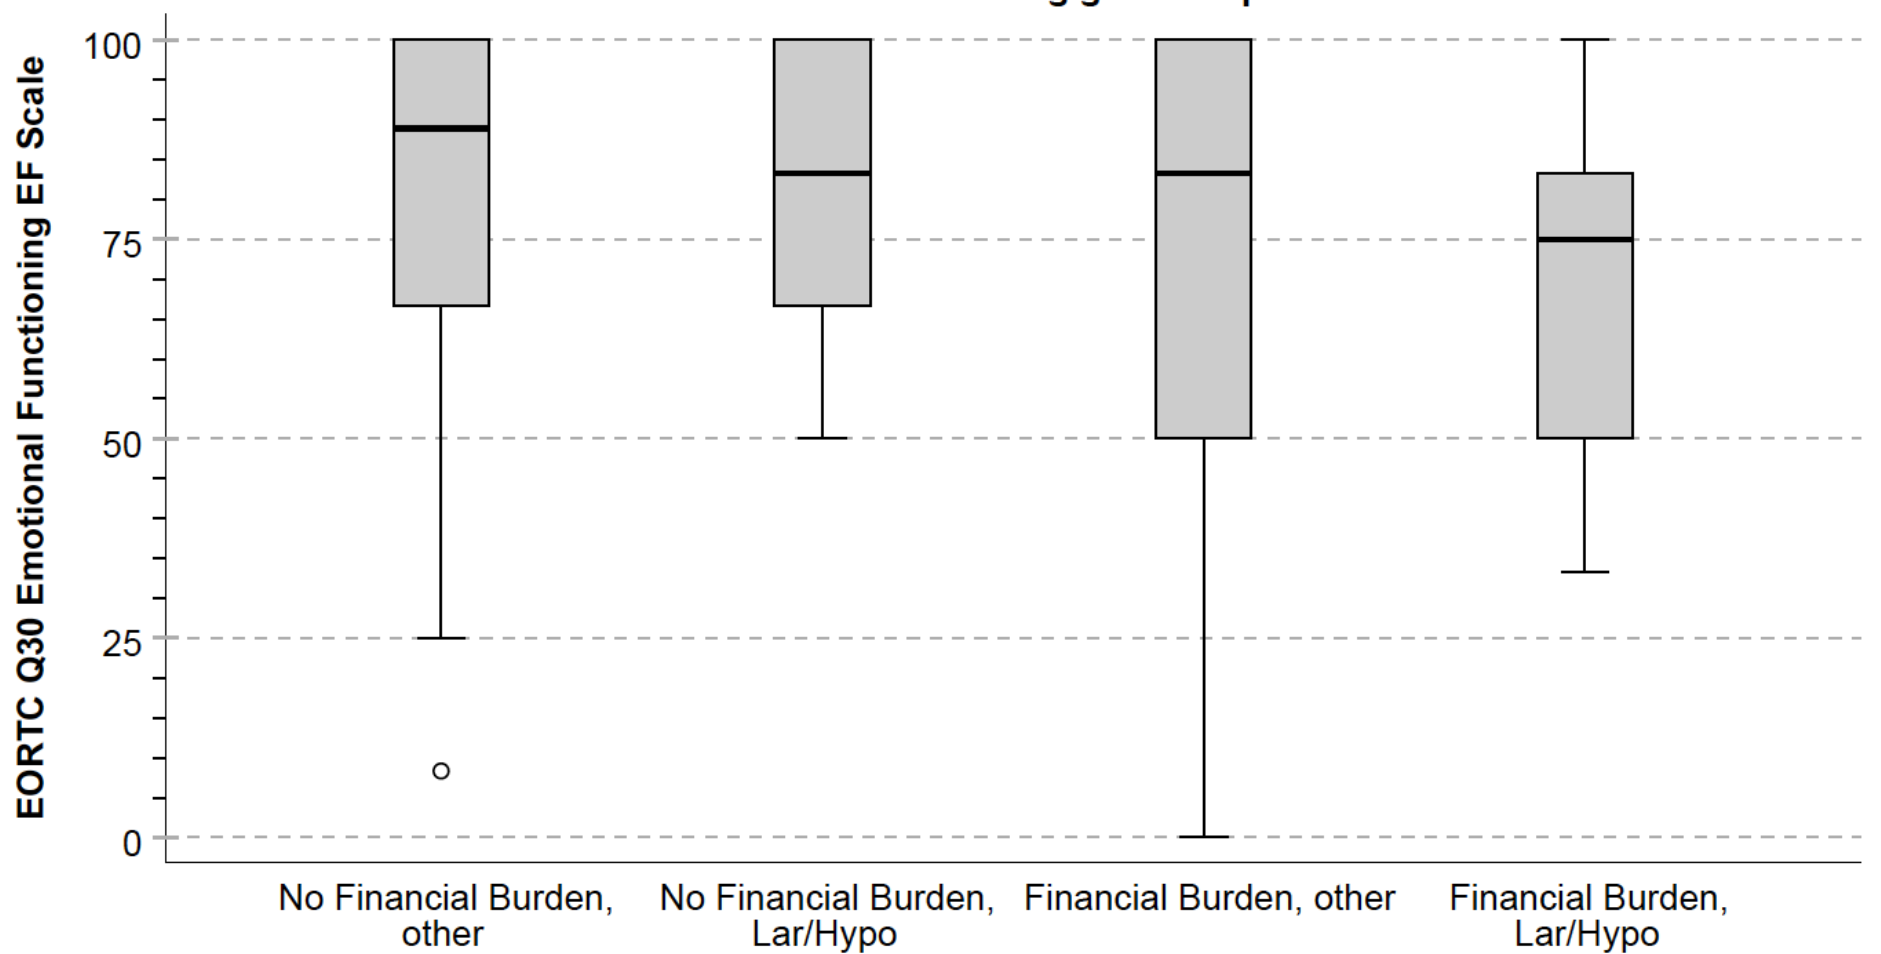

Financial Burden x Localization

Kruskal-Wallis-Test bei unabhängigen Stichproben

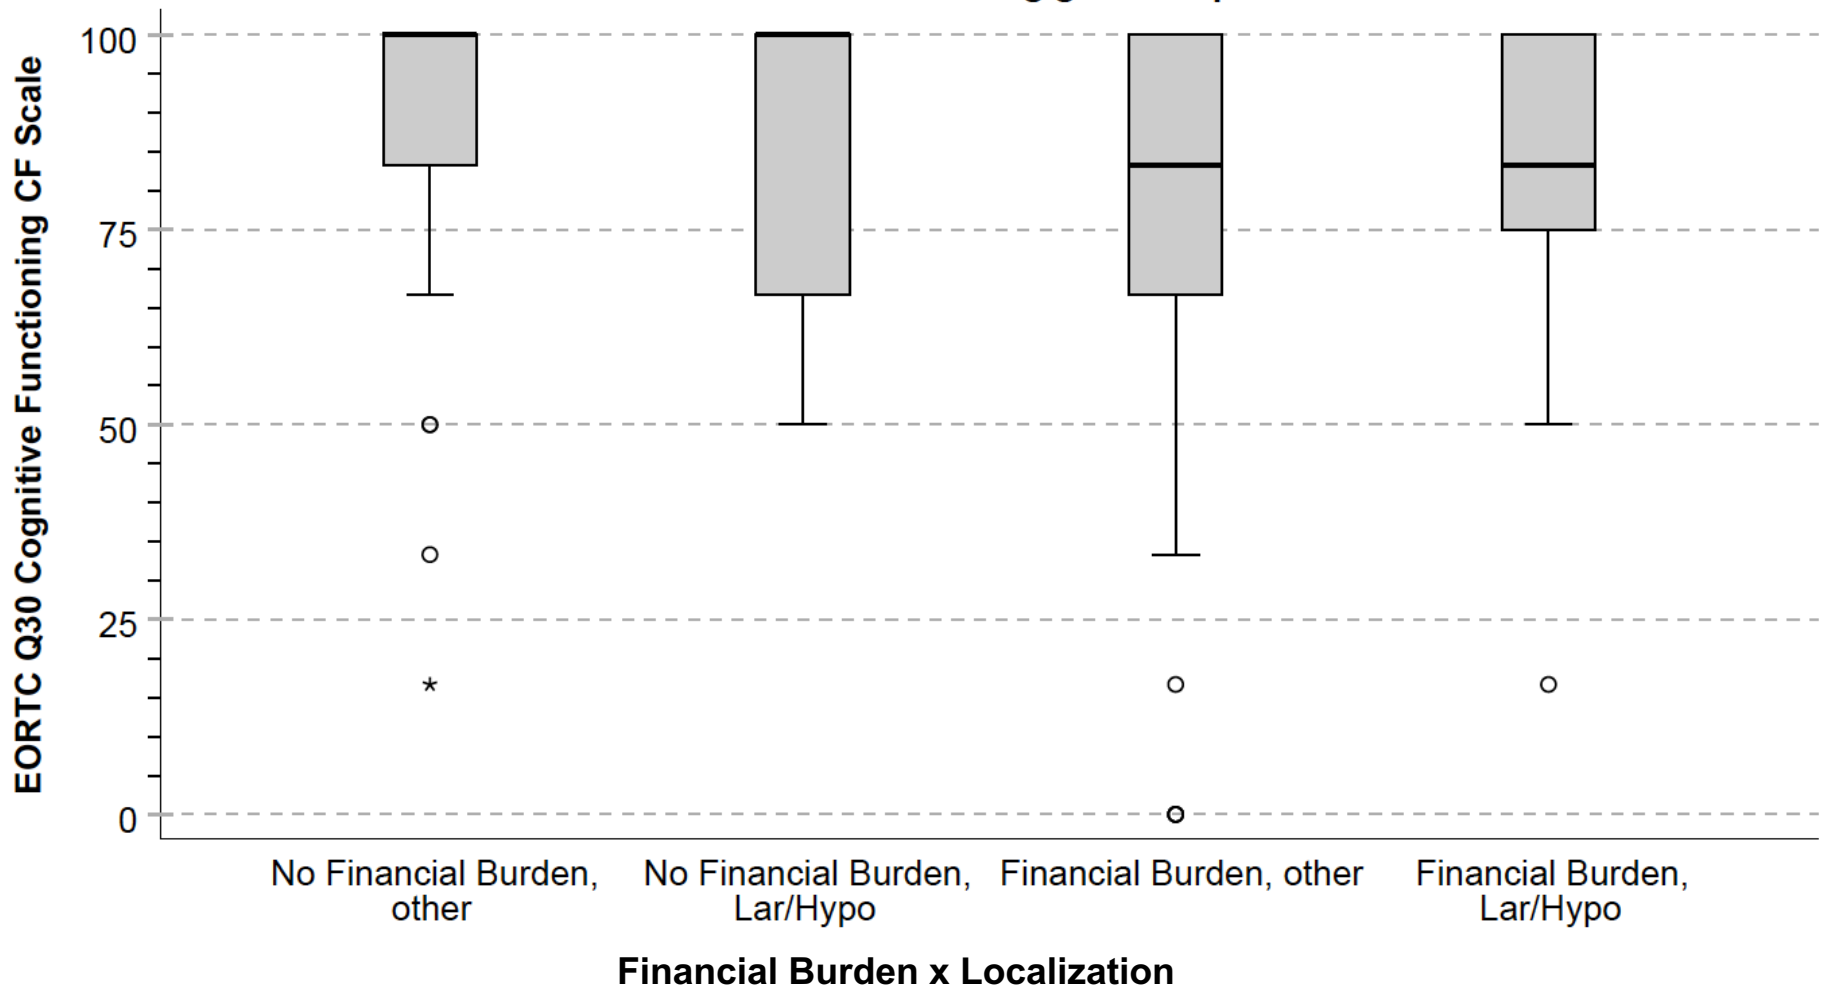

Kruskal-Wallis-Test bei unabhängigen Stichproben

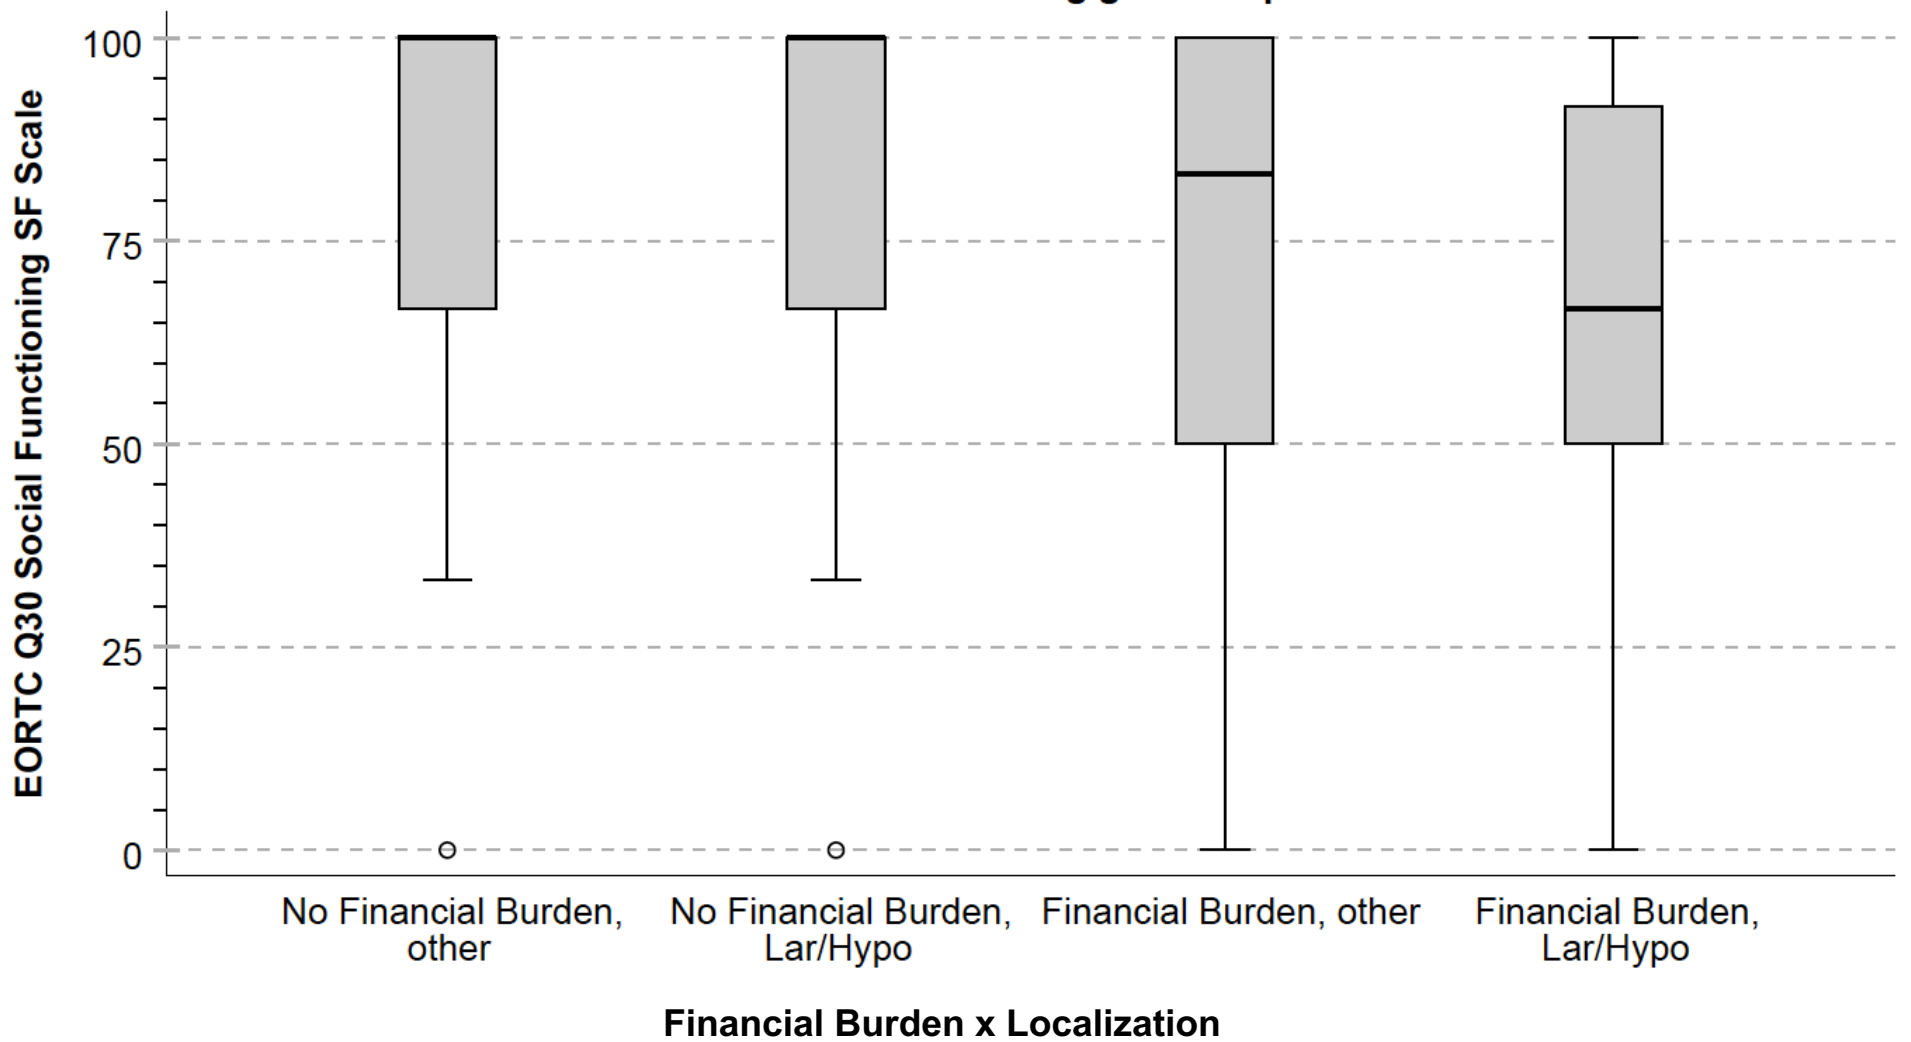

Kruskal-Wallis test for independent samples

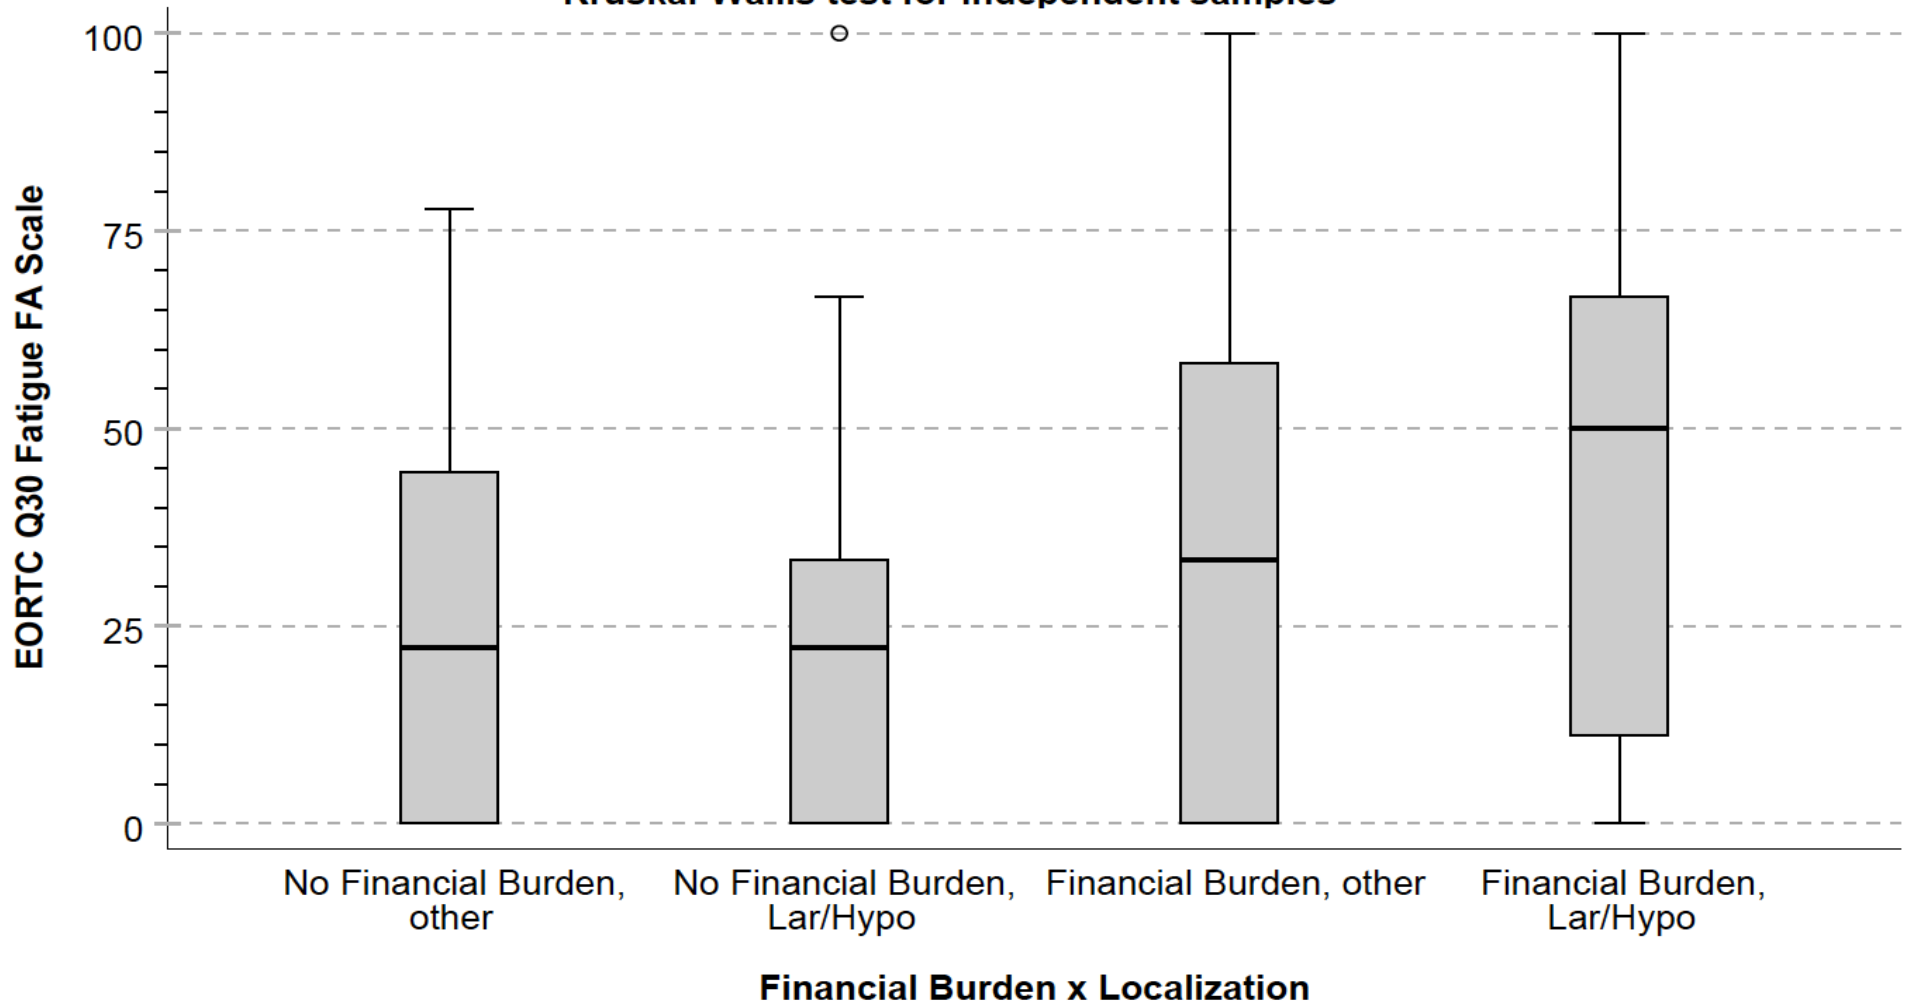

Kruskal-Wallis test for independent samples

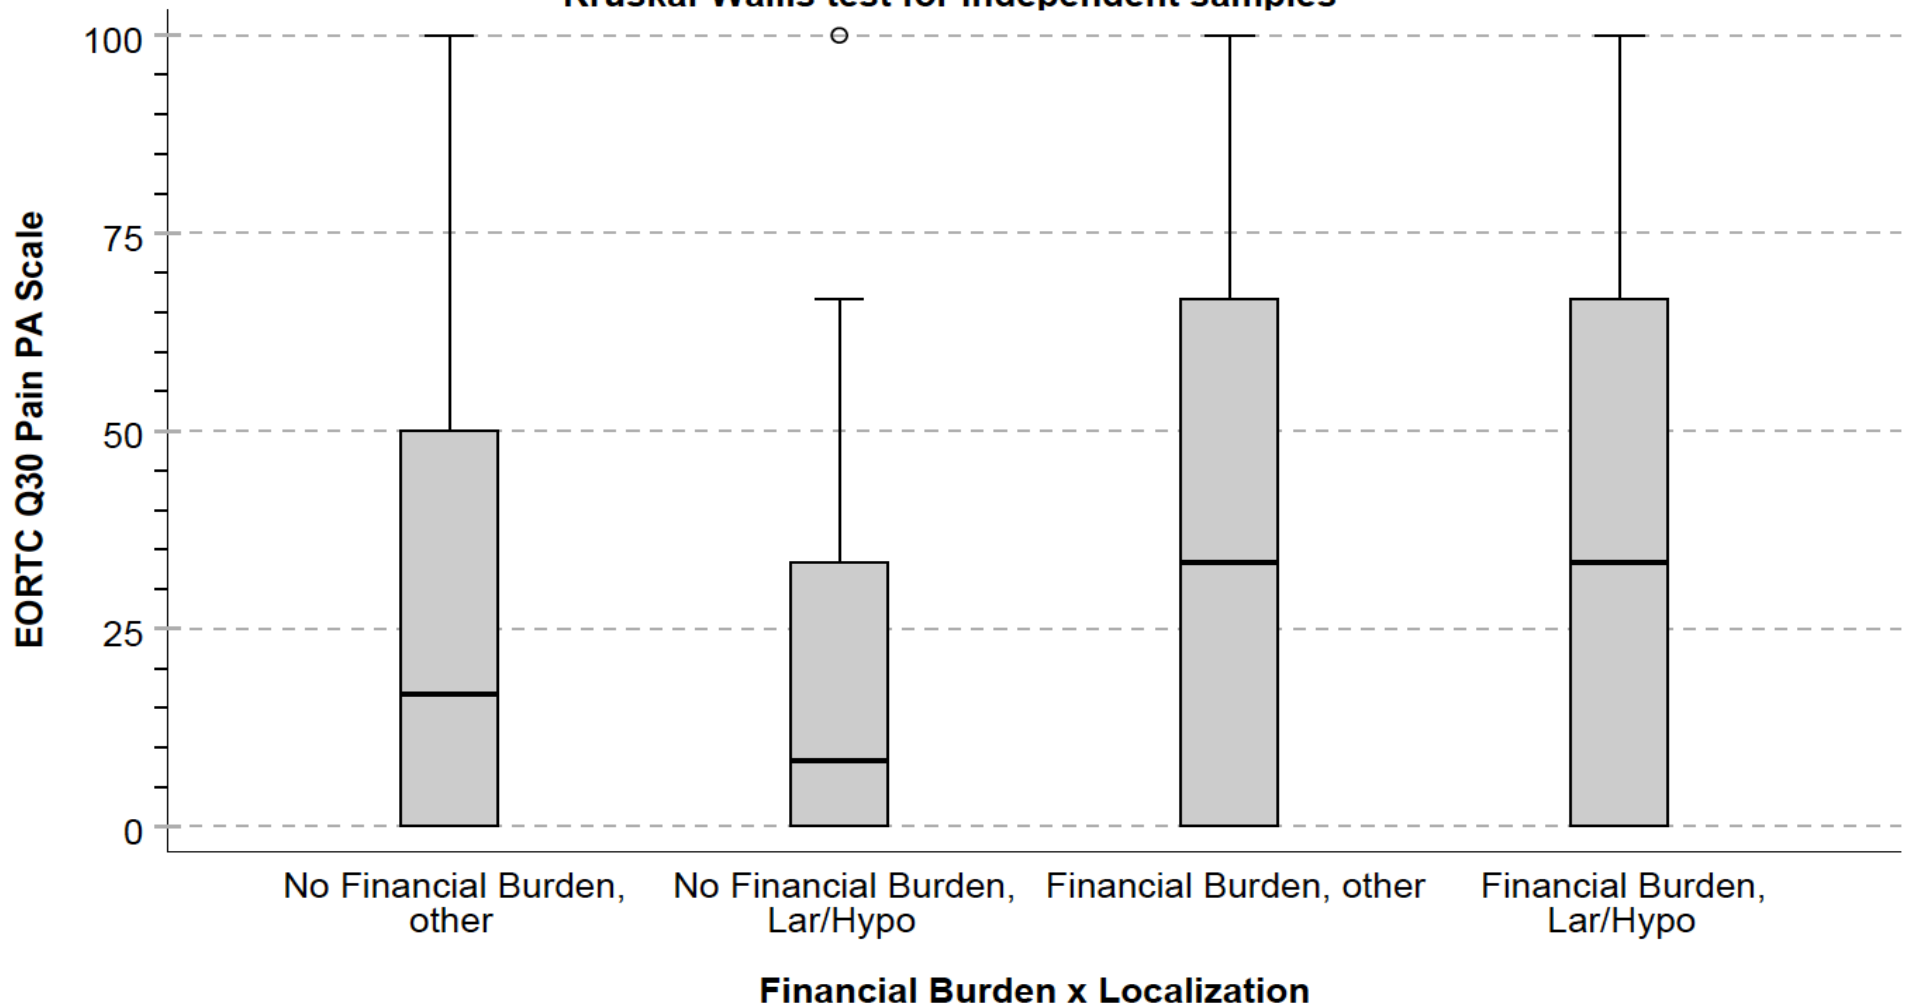

Kruskal-Wallis test for independent samples

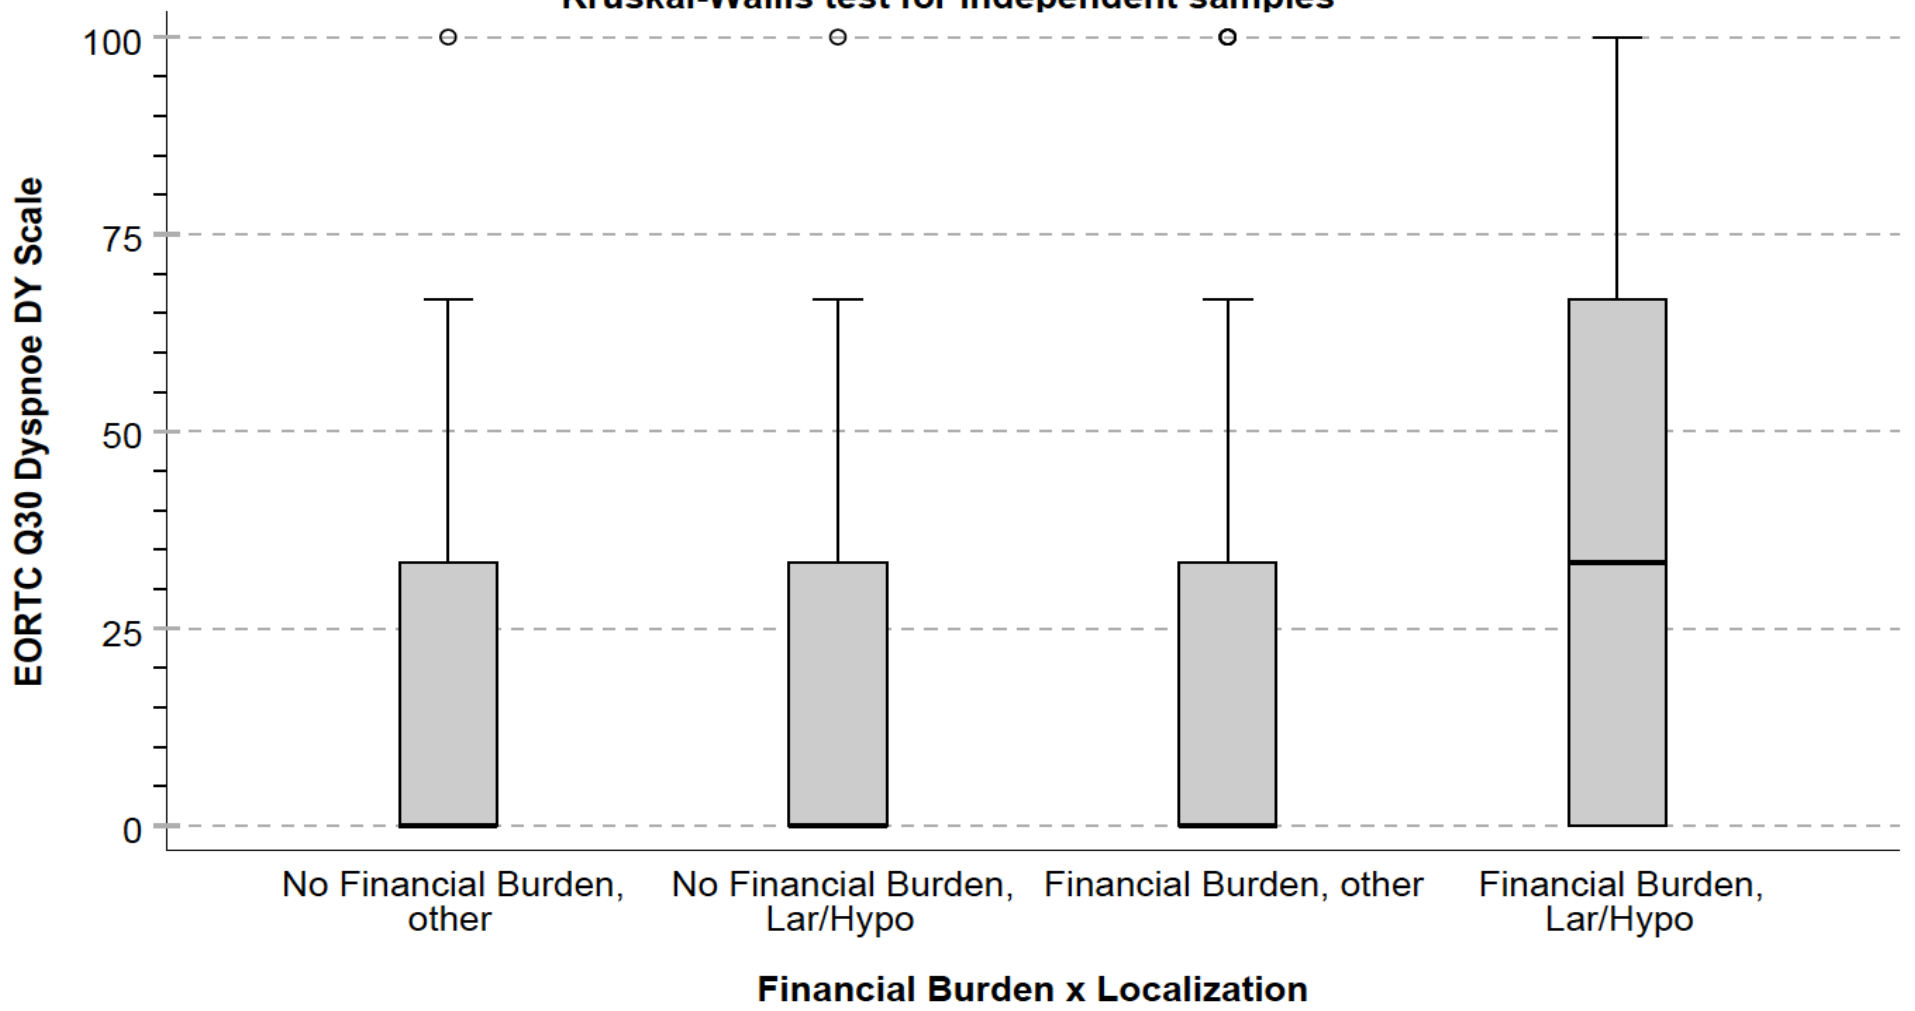

Kruskal-Wallis test for independent samples

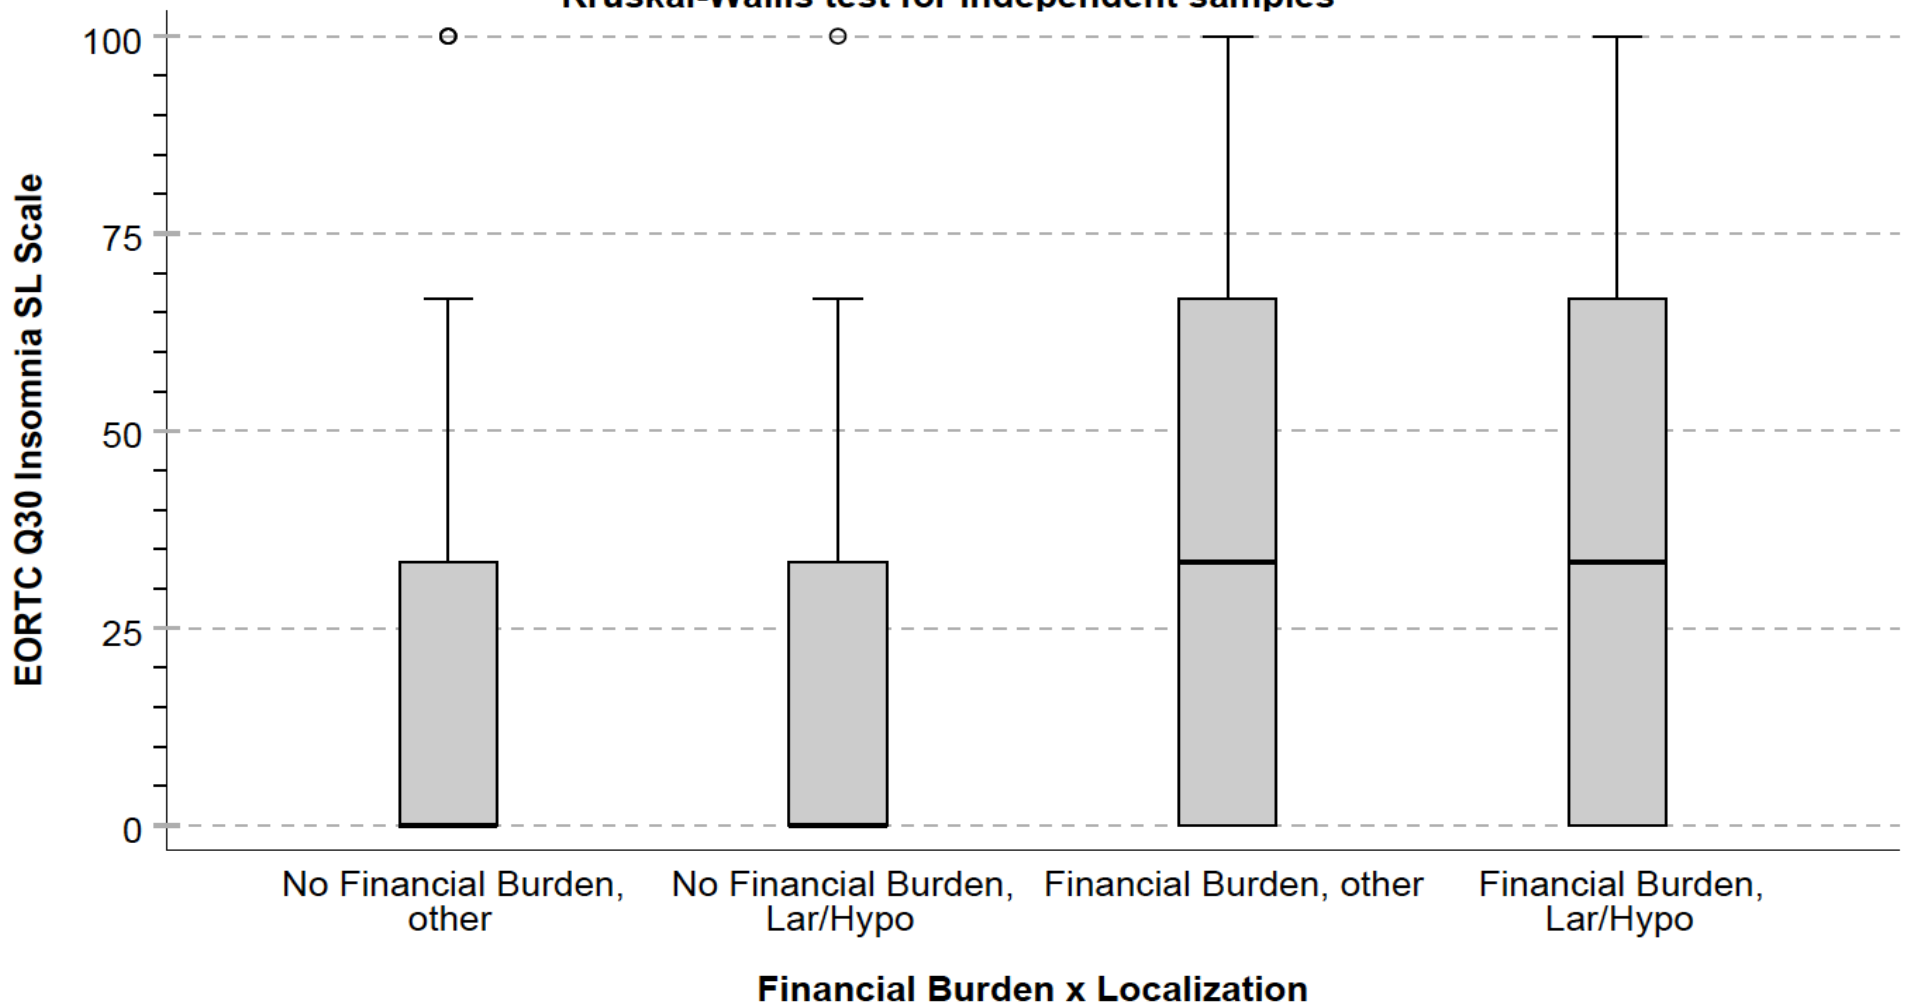

Kruskal-Wallis test for independent samples

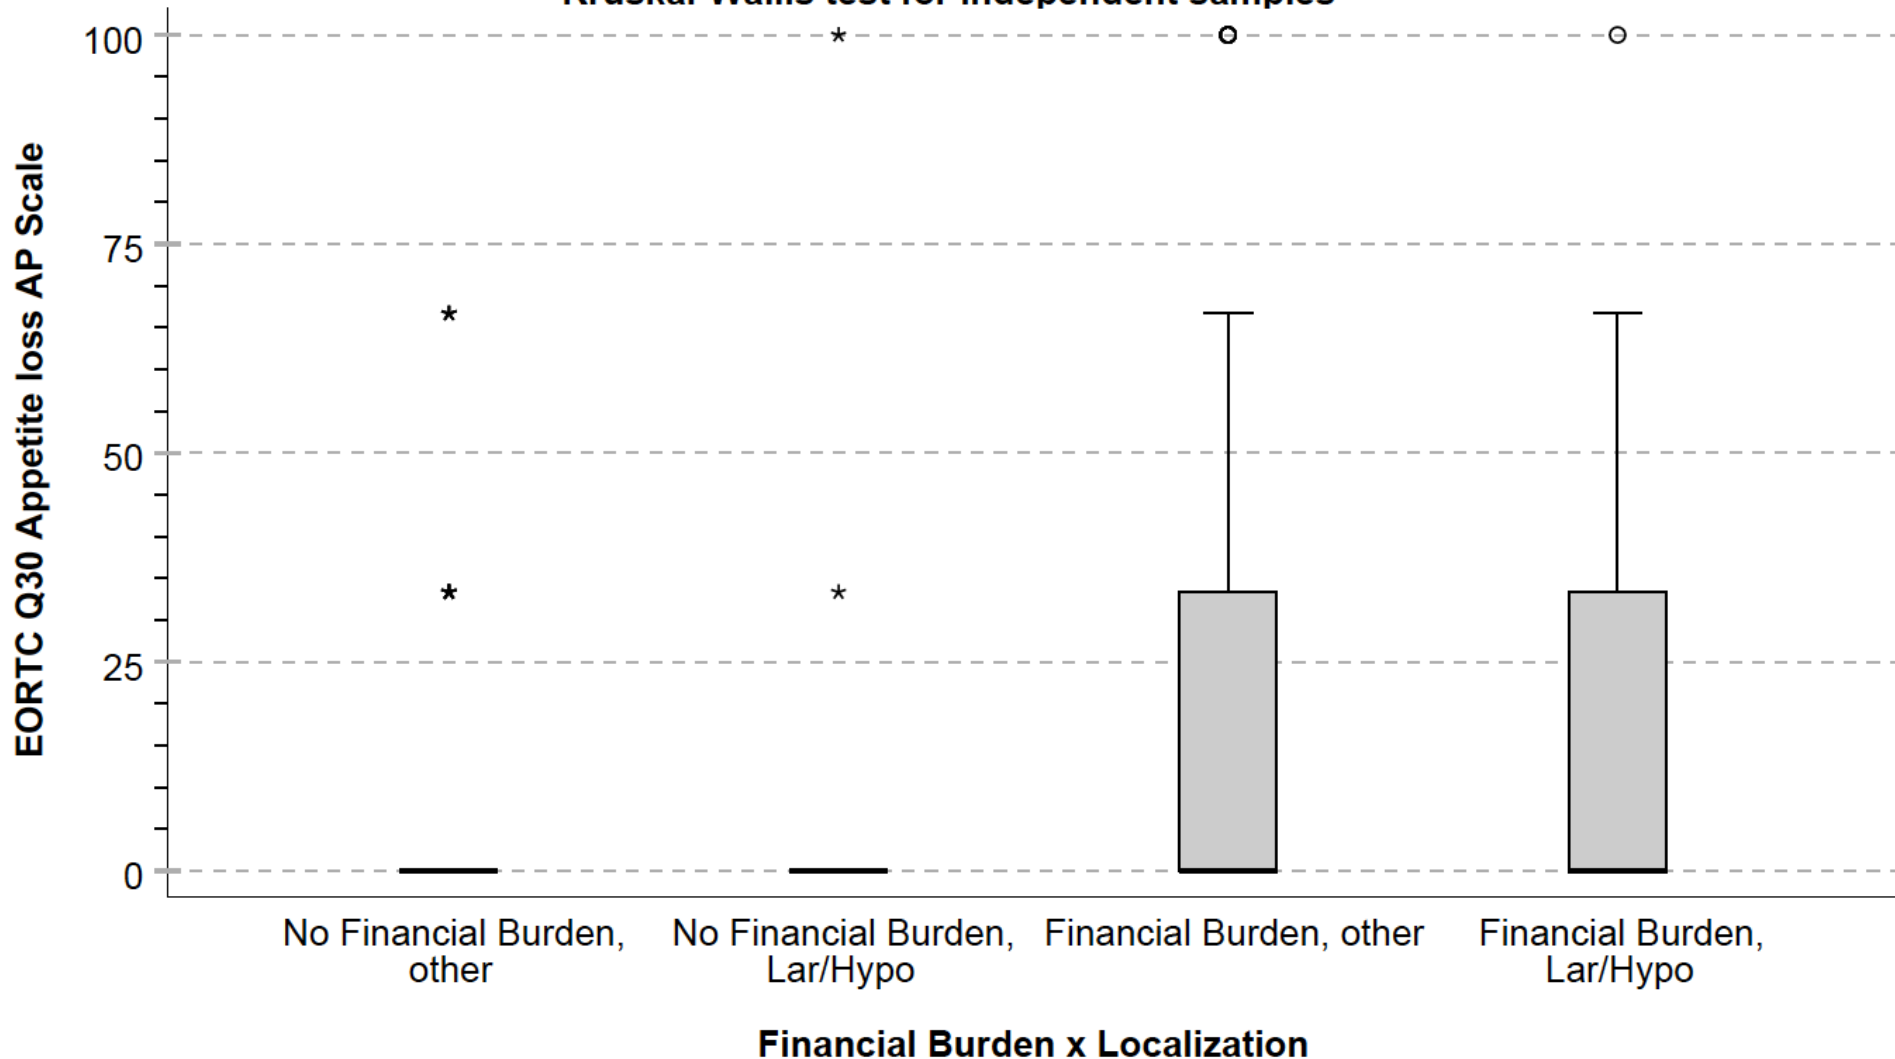

Kruskal-Wallis-Test bei unabhängigen Stichproben

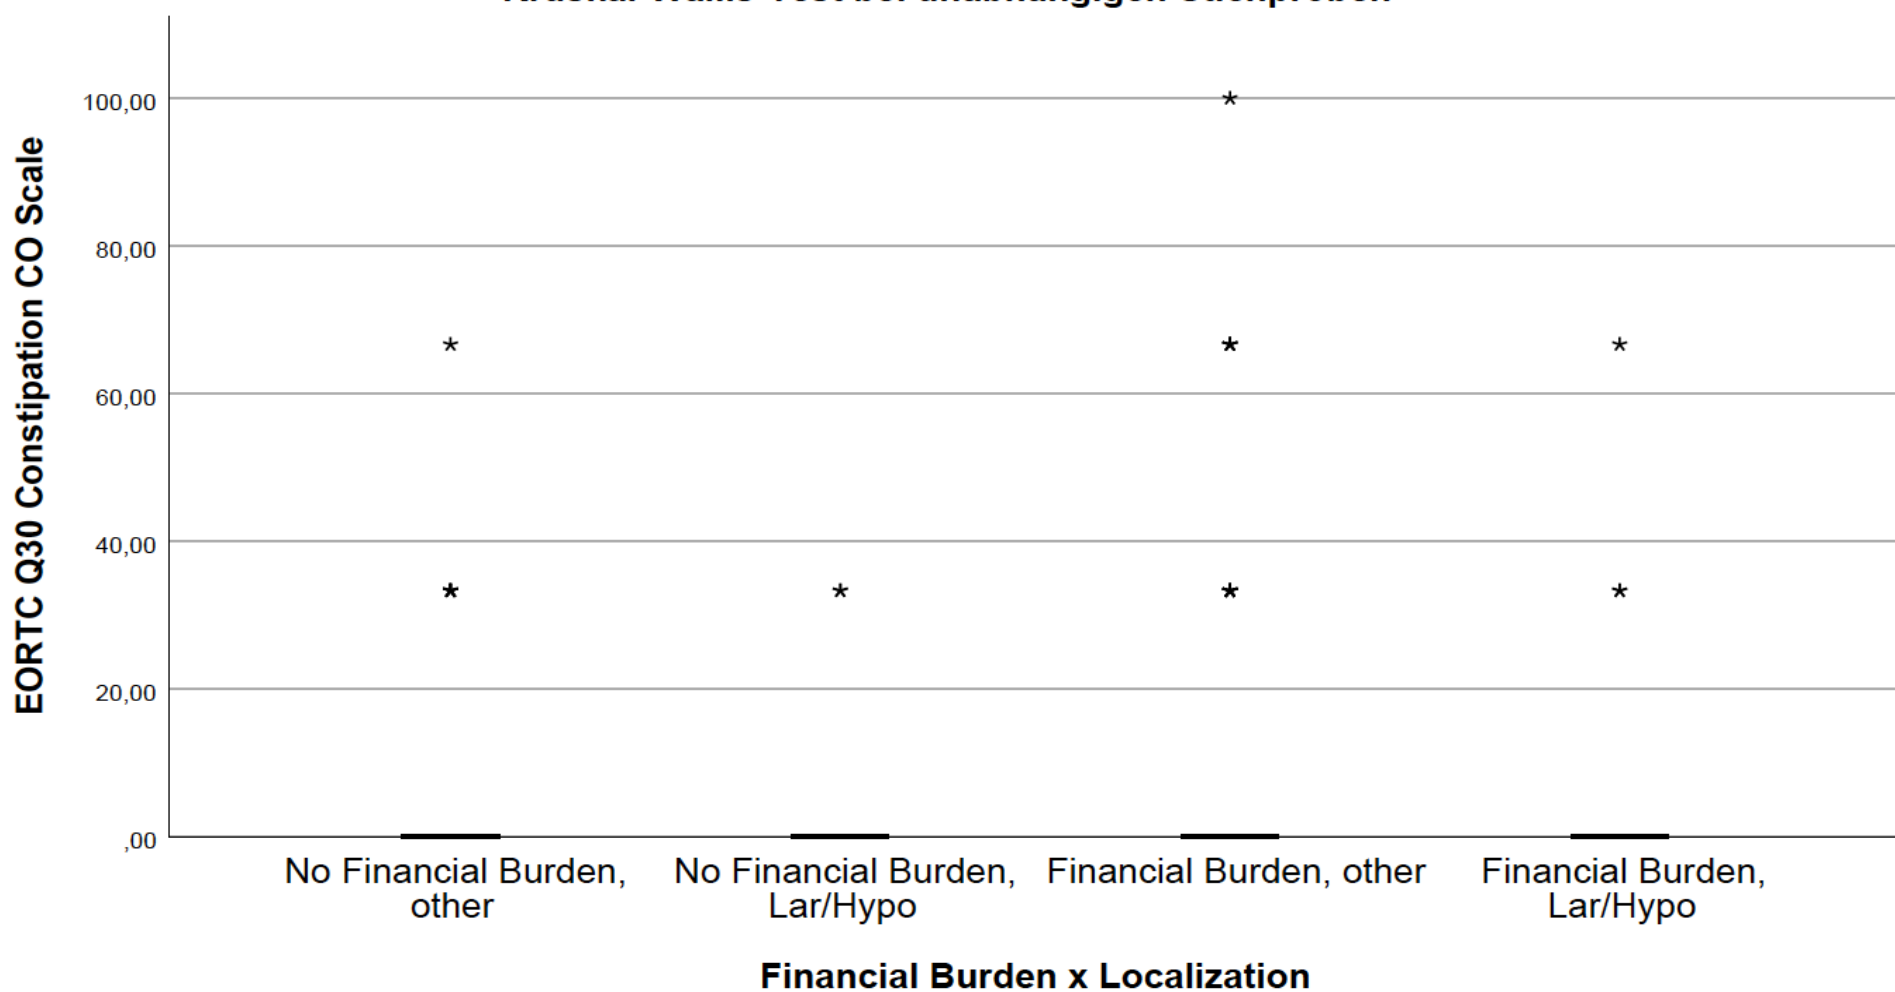

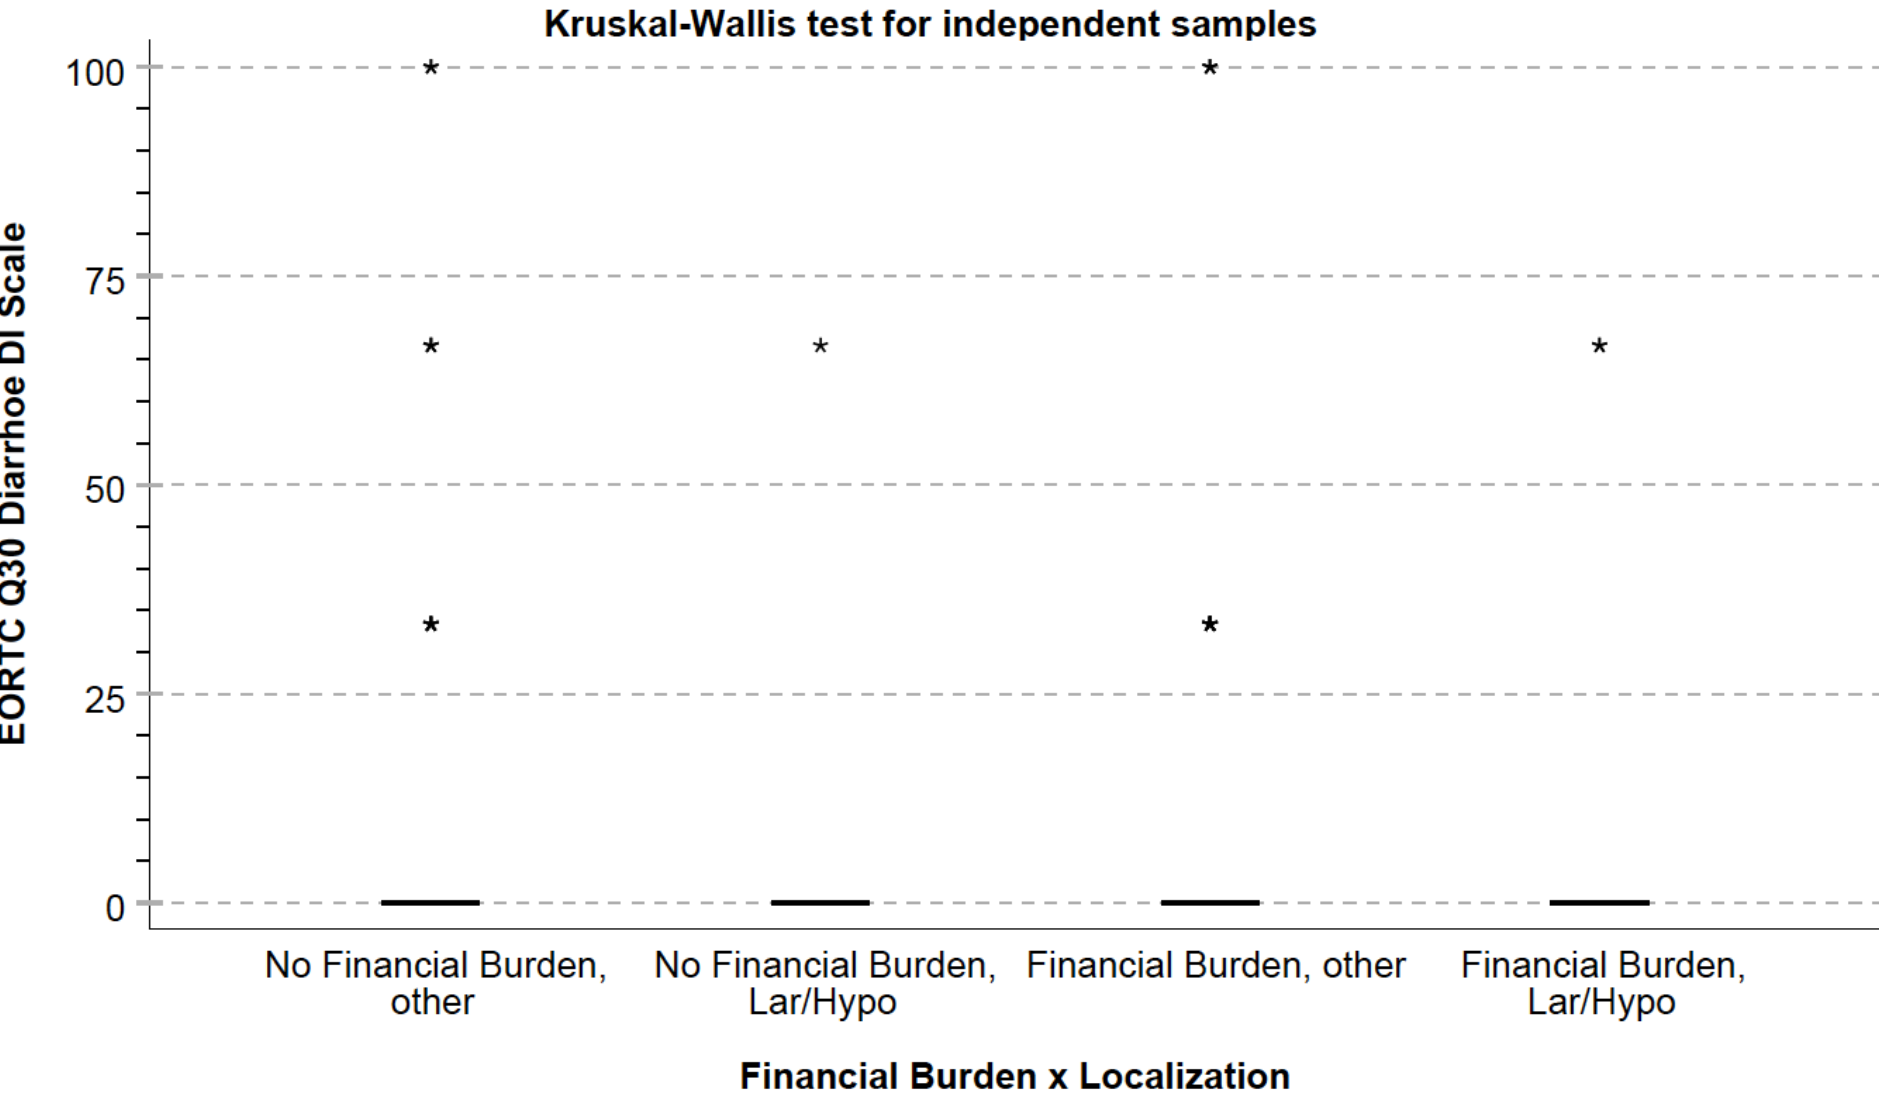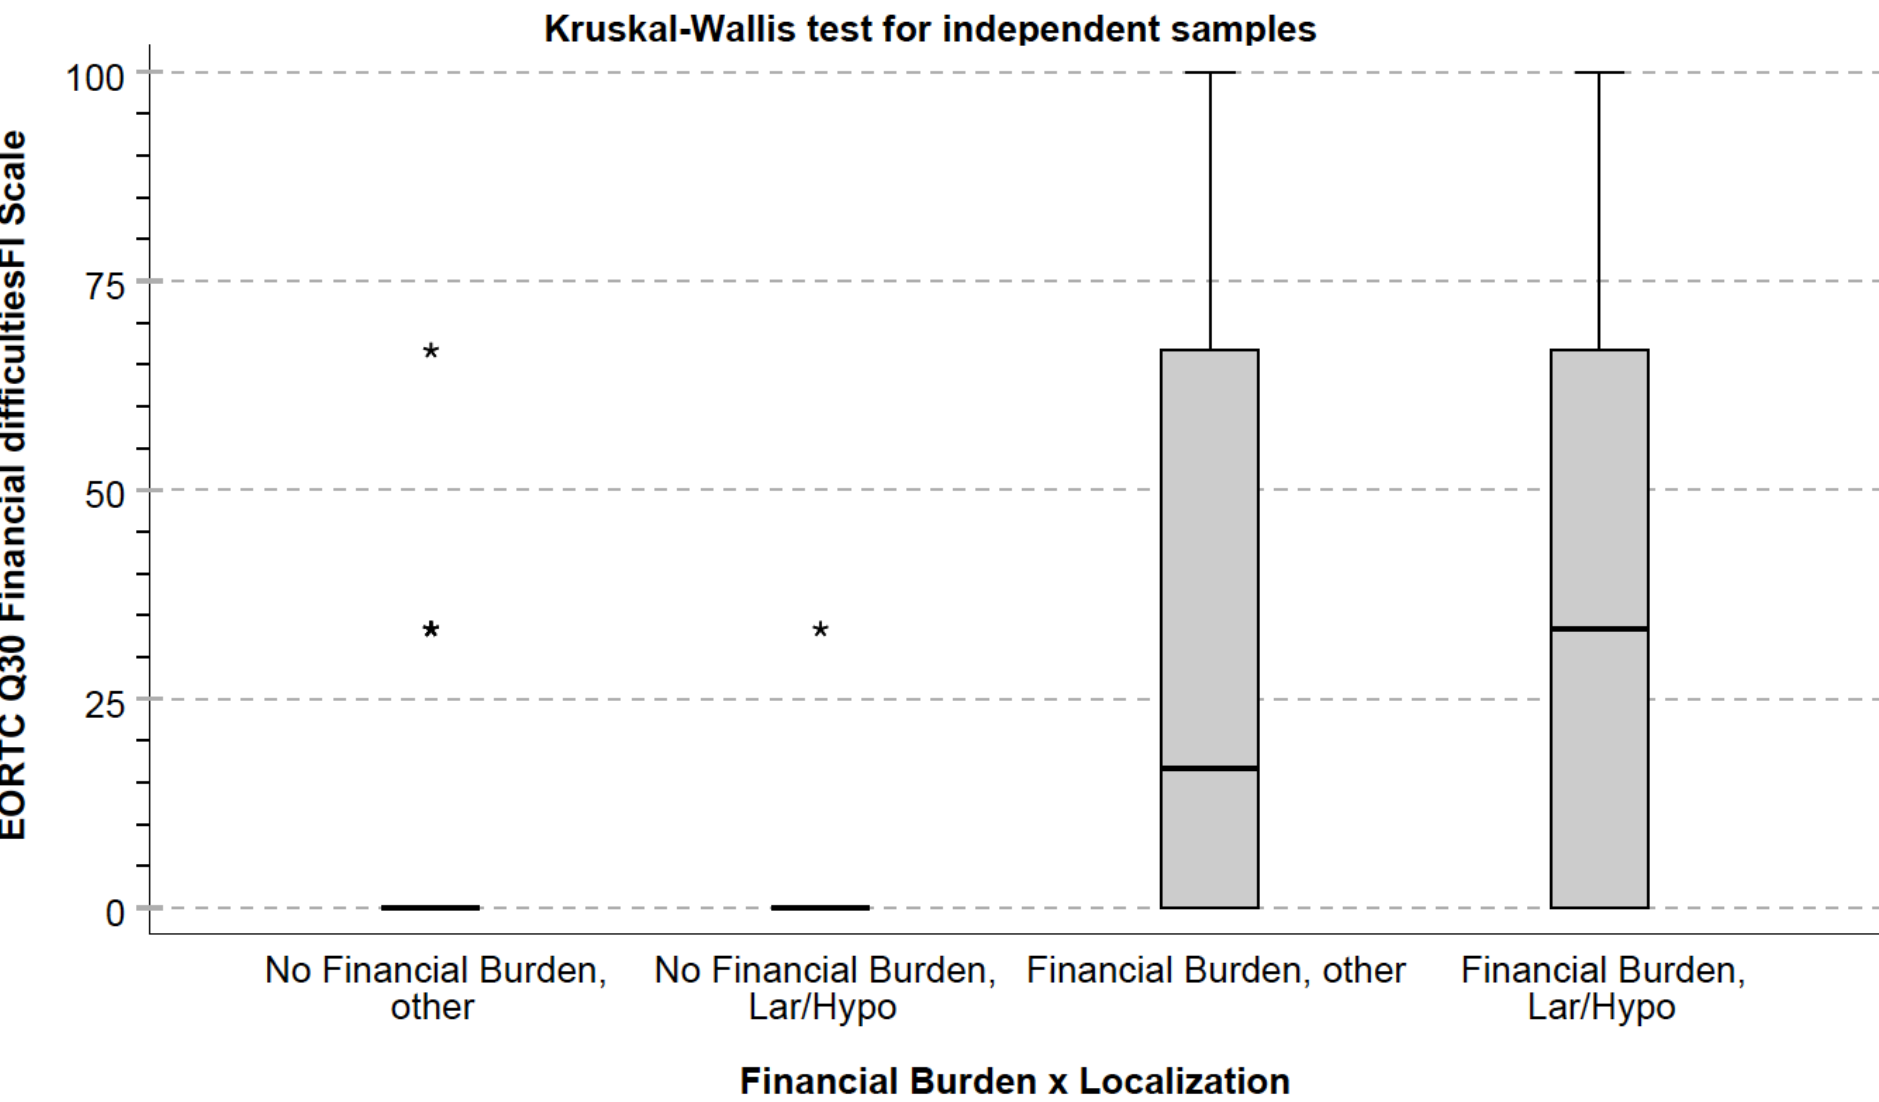

Supplement: MOESM1 [file 12885_2025_13927_MOESM1_ESM.pdf]
